# Supplementary material
Source: PubMed Central journal article supplement (PMC2553614)
Supplement: tpc.108.059352_1.pdf [file tpc.108.059352_1.pdf]

**Supplemental Data. Iwai et al. (2008). Molecular Remodeling of Photosystem II during State Transitions in *Chlamydomonas reinhardtii*.**

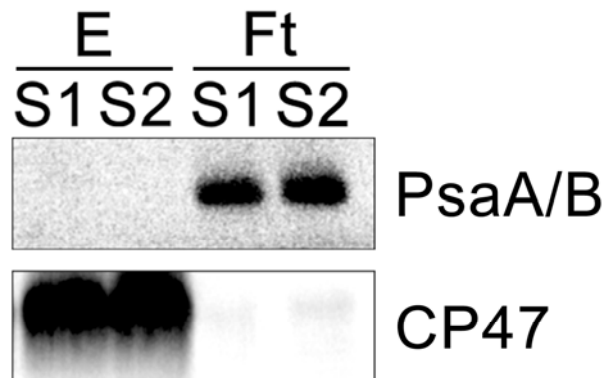

Supplemental Figure 1 online.

*Specificity of nickel affinity chromatography.* The bound (E) and flow-through (Ft) fractions from the nickel affinity chromatography of State 1 (S1) and State 2 (S2) samples were examined by western blotting. PSI and PSII proteins were identified using antibodies specific for PsaA/B and CP47, respectively.

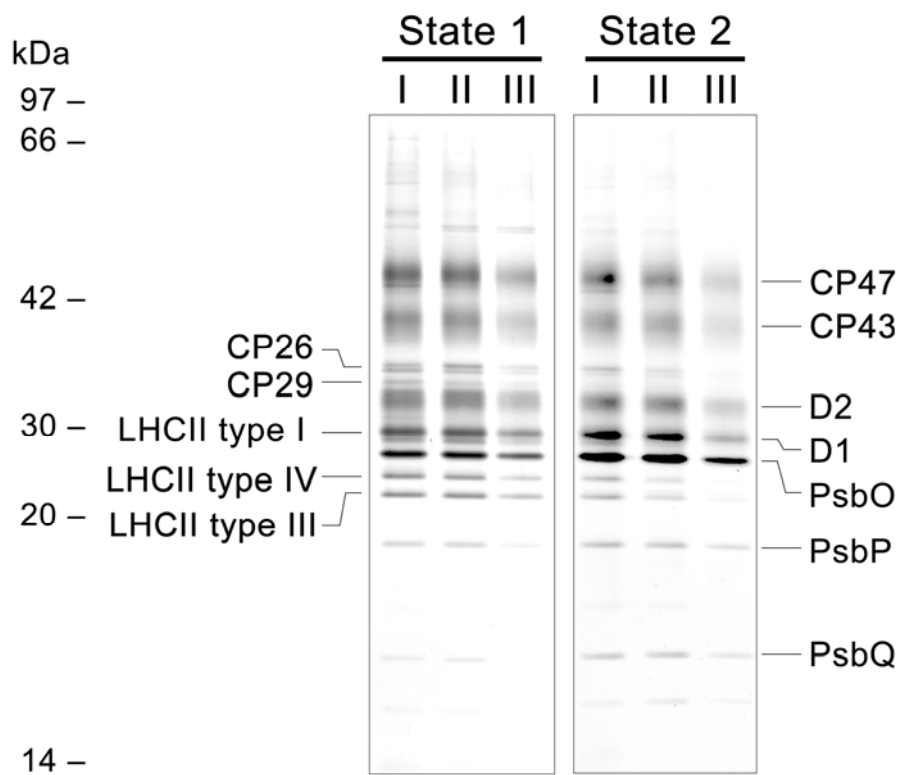

**Supplemental Figure 2 online.**

*Polypeptide composition in the gel-filtration fractions I–III in State 1 and 2.*  
 Polypeptides in 15  $\mu$ L of each fraction were separated by SDS-PAGE and silver stained.

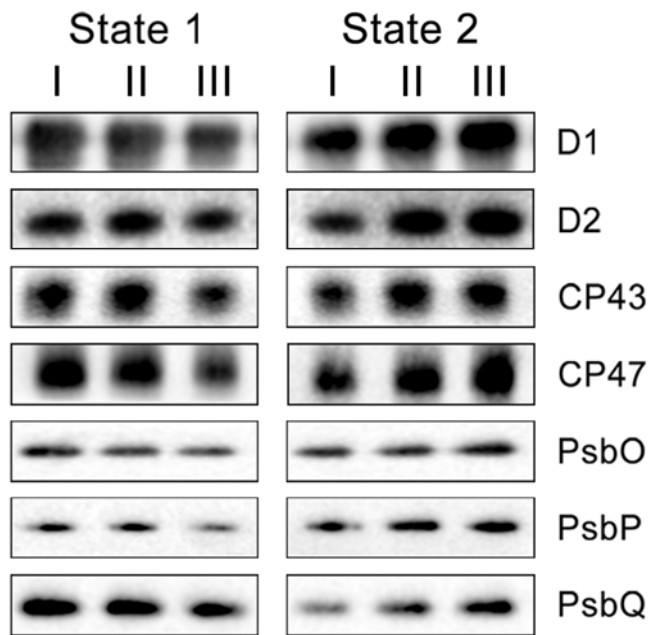

**Supplemental Figure 3 online.**

*Relative abundance of the PSII core subunits in the gel-filtration fractions from State 1- and State 2-locked samples.* Major subunits of PSII core in the State 1 and 2 samples were identified by western blotting using the specific antibodies as indicated. I, II, and III indicate the corresponding fractions isolated using gel-filtration (Figure 3). Ten  $\mu$ L from each fraction was loaded.

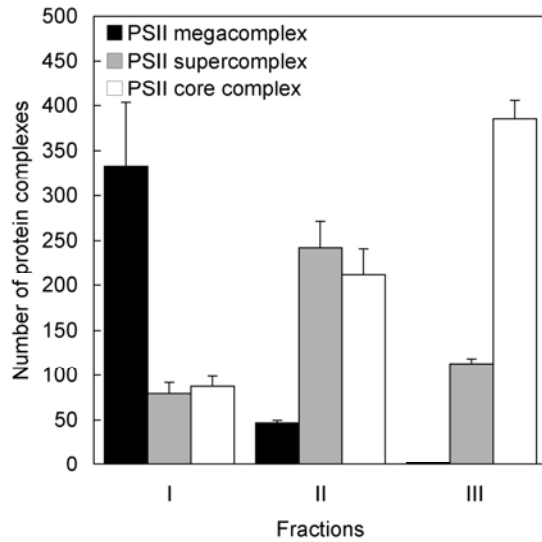

**Supplemental Figure 4 online.**

*Distribution of PSII particle projections on electron micrographs.* Particles corresponding to PSII-LHCII megacomplexes, PSII-LHCII supercomplexes, and PSII core were counted in randomly selected 500 particles on electron micrographs of Fractions I–III. A representative set of electron micrographs is shown in Figure 6. Data represent an average of two independent countings and are expressed as mean  $\pm$  SD.

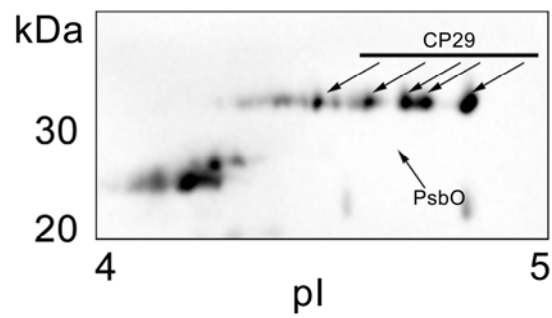

**Supplemental Figure 5 online.**

*Evidence for the correspondence between spot #12 in Figure 8D and CP29.*

Protein spot #12 on the 2-DE gel (Figure 8D) was identified by western blotting with an anti-CP29 antibody. Shown is the region between 20–40 kDa and pH 4.0–5.0 on the 2-DE gel.

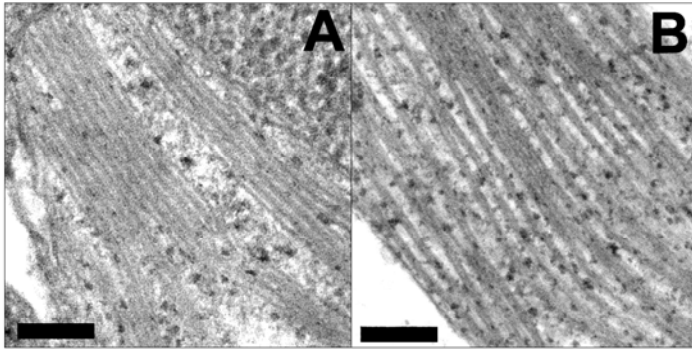

**Supplemental Figure 6 online.**

*Structure of thylakoid membranes in State 1 and State 2.* Membrane layers of the thylakoids in the cells locked in State 1 (**A**) and 2 (**B**) were observed under an electron microscope. Scale bars represent 100 nm.

**Supplemental Table 1 online.** Relative protein levels of the PSII core subunits in the three PSII fractions.

| PSII fraction  | D1 (%) <sup>a</sup> | CP47 (%) <sup>a</sup> | PsbO (%) <sup>a</sup> |
|----------------|---------------------|-----------------------|-----------------------|
| <i>State 1</i> |                     |                       |                       |
| I              | 100                 | 100                   | 100                   |
| II             | 86 ± 3              | 93 ± 17               | 81 ± 12               |
| III            | 65 ± 10             | 73 ± 19               | 54 ± 16               |
| <i>State 2</i> |                     |                       |                       |
| I              | 100                 | 100                   | 100                   |
| II             | 125 ± 24            | 133 ± 19              | 148 ± 42              |
| III            | 135 ± 38            | 146 ± 71              | 163 ± 27              |

<sup>a</sup> Protein levels detected by western blotting (Supplemental Figure 3 online) were quantified using ImageJ software. Values shown are means of three measurements ± SD normalized to the value of Fraction I.

**Supplemental Table 2 online.** MS/MS analysis of the LHCII proteins bound to the PSII complexes<sup>a</sup>.

| Spot <sup>b</sup> | Peptide sequence           | Predicted protein | Position <sup>c</sup> |
|-------------------|----------------------------|-------------------|-----------------------|
| 1                 | YRENELLHAR                 | CP26              | 100–109               |
|                   | HVADPFGYNLLTVLGAEER        | CP26              | 267–285               |
| 2                 | GWLGGQGGAADLDKWYGPDR       | CP26              | 38–57                 |
|                   | GWLGGQGGAADLDKWYGPDRK      | CP26              | 38–58                 |
|                   | KLFLPSGLYDR                | CP26              | 58–68                 |
|                   | LFLPSGLYDR                 | CP26              | 59–68                 |
|                   | SEIPEYLNAGELAGDYGYPDPLGLGK | CP26              | 69–92                 |
|                   | YRENELLHAR                 | CP26              | 100–109               |
|                   | WAMLAAAGILPEGLQANGANIK     | CP26              | 110–132               |
|                   | NGTGPAAGYSPGIGK            | CP26              | 185–198               |
|                   | HVADPFGYNLLTVLGAEER        | CP26              | 267–285               |
| 3                 | LAPYSEVFGLAR               | CP29              | 121–132               |
| 4                 | SGTQFGEAVWFK               | LhcbM3            | 113–124               |
|                   | GPIQNLDDHLSNPTVNNAFAFATK   | LhcbM3            | 229–252               |
|                   | SGTKFGEAVWFK               | LhcbM4/6          | 110–121               |
| 5                 | SSGVEFYGPNR                | LhcbM4/6 /9       | 32–42                 |
| 6                 | VNGGPLGEGLDK               | LhcbM1            | 168–179               |
|                   | LYPGGSFDPLGLADDPDTFAELK    | LhcbM1            | 180–202               |
|                   | GPLQNLSHDLANPGTNNAFAYATK   | LhcbM1            | 229–252               |
| 7                 | LYPGGSFDPLGLADDPDTFAELK    | LhcbM1            | 180–202               |
|                   | GPLQNLSHDLANPGTNNAFAYATK   | LhcbM1            | 229–252               |
| 8                 | GPIQNLDDHLANPTAVNAFAFAYATK | LhcbM2/7          | 221–244               |



<sup>a</sup> PSII complexes were isolated from State 2-locked samples

<sup>b</sup> Numbered spots correspond to those shown in Figure 5.

<sup>c</sup> Amino acid position in the corresponding protein.

**Supplemental Table 3 online.** MS/MS analysis of the free LHCII proteins in the nickel affinity chromatography flow-through<sup>a</sup>.

| Spot <sup>b</sup> | Peptide sequence                                                | Predicted protein | Position <sup>c</sup> |
|-------------------|-----------------------------------------------------------------|-------------------|-----------------------|
| 10                | YRENELLHAR                                                      | CP26              | 100–109               |
|                   | HVADPFGYNLLTVLGAEER                                             | CP26              | 267–285               |
| 11                | GWLGGQGGGAADLDKWYGPDR                                           | CP26              | 38–57                 |
|                   | GWLGGQGGGAADLDKWYGPDRK                                          | CP26              | 38–58                 |
|                   | KLFLPSGLYDR                                                     | CP26              | 58–68                 |
|                   | LFLPSGLYDR                                                      | CP26              | 59–68                 |
|                   | SEIPEYLNAGELAGDYGYDPLGLGK                                       | CP26              | 69–92                 |
|                   | YRENELLHAR                                                      | CP26              | 100–109               |
|                   | WAMLAAAGILYPEGLQANGANIK                                         | CP26              | 110–132               |
|                   | NGTGPAAGYSPGIGK                                                 | CP26              | 185–198               |
|                   | HVADPFGYNLLTVLGAEER                                             | CP26              | 267–285               |
| 12                | Confirmed by western blotting<br>(Supplemental Figure 5 online) | CP29              |                       |
| 13                | SGTQFGEAVWFK                                                    | LhcbM3            | 113–124               |
|                   | GPIQNLDDHLSNPTVNNAFAFATK                                        | LhcbM3            | 229–252               |
| 14                | SGTKFGEAVWFK                                                    | LhcbM4/6          | 110–121               |
| 15                | SSGVEFYGPNR                                                     | LhcbM4/6/9        | 32–42                 |
| 16                | VNGGPLGEGLDK                                                    | LhcbM1            | 86–95                 |
| 17                | LYPGGSFDPLGLADDPDTFAELK                                         | LhcbM1            | 180–202               |
|                   | GPLQNLSHDLANPGTNNAFAYATK                                        | LhcbM1            | 229–252               |
| 18                | LYPGGSFDPLGLADDPDTFAELK                                         | LhcbM1            | 86–95                 |

|    |                               |          |         |
|----|-------------------------------|----------|---------|
|    | GPLQNLSHDLANPGTNNAFAYATK      | LhcbM1   | 229–252 |
| 19 | GPIQNLDHDLANPTAVNAFAYATK      | LhcbM2/7 | 221–244 |
| 20 | VNGGPLGEGLDK                  | LhcbM1   | 86–95   |
|    | LYPGGSFDPLGLADDPDTFAELK       | LhcbM1   | 180–202 |
|    | GPLQNLSHDLANPGTNNAFAYATK      | LhcbM1   | 229–252 |
| 21 | AAIEWYGPDRPK                  | LhcbM2   | 28–39   |
|    | NGIPFGEAVWFK                  | LhcbM2/7 | 105–116 |
|    | ANGGPLGEGLDPLHPGGAFDPLGLADDPD | LhcbM2/7 | 160–194 |
|    | TFAELK                        |          |         |
|    | GPIQNLDHDLANPTAVNAFAYATK      | LhcbM2/7 | 221–244 |
| 22 | NGIPFGEAVWFK                  | LhcbM2/7 | 105–116 |
|    | ANGGPLGEGLDPLHPGGAFDPLGLADDPD | LhcbM2/7 |         |
|    | TFAELK                        |          | 160–194 |
|    | GPIQNLDHDLANPTAVNAFAYATK      | LhcbM2/7 | 221–244 |

---

<sup>a</sup> PSII complexes were isolated from a State 2-locked sample

<sup>b</sup> Numbered spots correspond to those shown in Figure 8.

<sup>c</sup> Amino acid position in the corresponding protein.
